# Supplementary material for: Hierarchically designed hybrid nanoparticles for combinational photochemotherapy against a pancreatic cancer cell line
Source: Royal Society of Chemistry journal article supplement (doi:10.1039/c7tb03261g), 2018-01-01
Supplement: c7tb03261g1.pdf [file c7tb03261g1.pdf]

## Supporting information

### Hierarchically designed hybrid nanoparticles for combinational photochemotherapy of pancreatic cancer

F. Joubert <sup>a</sup> and G. Pasparakis <sup>\*a</sup>

<sup>a</sup> UCL School of Pharmacy, 29-39 Brunswick square, WC1N 1AX London, UK

\* corresponding author: g.pasparakis@ucl.ac.uk

#### Calculation of the amount of GEM per particles

The calculation have been made for the Hybrid NPs of sample S7' where the loading in GNPs was maximal. From the TEM images, the average size diameter of the hybrid NPs was found to be 144 nm. We hypothesise the hybrid NPs can be seen as one large spherical GNPs with a volume ( $V_{\text{GNPs}}$ ) being  $1.563 \times 10^{-15} \text{ cm}^3$  (i.e.  $4\pi/3R^3$ ). The Gold has a density of  $19.320 \text{ g/cm}^3$  and the amount of GNPs used was 0.4 mg, hence the amount of place taken by the Gold is defined by the ratio of the amount of Gold to its density and was found to be  $2.070 \times 10^{-5} \text{ cm}^3$ . The number of hybrid NPs is obtained from the ratio of the amount of place taken by Gold to the  $V_{\text{GNPs}}$  and was found to be  $1.324 \times 10^{19}$  particles. For the hybrid NPs of sample S7', the amount of GEM-polymer conjugate was 15.625  $\mu\text{g}$ . The total amount of GEM-polymer conjugate per particles is found to be  $1.177 \times 10^{-18} \mu\text{g}$ . Finally, the amount of GEM per hybrid NPs is estimated to be  $0.588 \times 10^{-18} \mu\text{g}$ .

#### Calculation of the photothermal conversion efficiency

The photothermal conversion efficiency ( $\eta$ ) of hybrid NPs was calculated according to Hu's report.<sup>1</sup>

$$\eta = \frac{hS(T_{\text{max}} - T_s) - Q_{\text{Dis}}}{I(1 - 10^{-A_{640}})}$$

where  $h$  is the heat transfer coefficient,  $S$  the surface area of the container and the value  $hS$  is obtained from Eq. 4 and Fig. 5c. The maximum steady temperature ( $T_{\text{max}}$ ) of the aqueous solution of the hybrid NPs was  $46.4 \text{ }^\circ\text{C}$  and surrounding temperature was  $34.2 \text{ }^\circ\text{C}$ . So the temperature change ( $T_{\text{max}} - T_s$ ) of the solution of hybrid NPs was  $12.2 \text{ }^\circ\text{C}$ . The laser power  $I$  is  $0.9 \text{ W}$ . The absorbance of the hybrid NPs at  $640 \text{ nm}$  is  $0.72$ .  $Q_{\text{Dis}}$  defines the heat dissipated from the light absorbed by the solvent and the container and is  $29 \text{ mW}$ .

In order to gain  $hS$ , a dimensionless parameter  $\theta$  is introduced as follows (Eq. 1):

$$\theta = \frac{T - T_s}{T_{\text{max}} - T_s}$$

A sample system time constant  $\tau_s$  can be calculated as follows (Eq. 2):

$$t = -\tau_s \text{Ln}(\theta)$$

According to Fig. 5c,  $\tau_s$  was determined and found to be 104.08.

$$hS = \frac{m_D C_D}{\tau_s}$$

where  $m_D$  and  $C_D$  are the the mass and heat capacity of the solvent. Here,  $m_D$  is 1 g and  $C_D$  is 4.2 J/g. °C, hence  $hS$  is 0.04 W/°C.

Substituting  $hS$  value into Eq. 1, the photothermal conversion efficiency ( $\eta$ ) of hybrid NPs was calculated to be 63%.

The  $\tau_s$  of the GNPs was determined and was found to be 81.62 (Fig. S4),  $hS$  is deducted to be 0.05 W/°C. The absorbance of the GNPs at 640 nm is 0.10, finally the photothermal effect of the GNPs was found to be 54%.

### **Calculation of the combination index (CI)**

The combination index (CI) was calculated using the following equation.<sup>2</sup>

$$CI = \frac{C_{A,X}}{IC_{X,A}} + \frac{C_{B,X}}{IC_{X,B}}$$

where  $C_{A,X}$  and  $C_{B,X}$  are the concentration of A and B used in combination to achieve x % drug effect.  $IC_{X,A}$  and  $IC_{X,B}$  are the concentration for single agents to achieve the same effect. In our case, A and B represent GEM-polymer conjugate NPs and GNPs respectively and the  $IC_{50}$  is the drug effect which is look at to determine the CI.

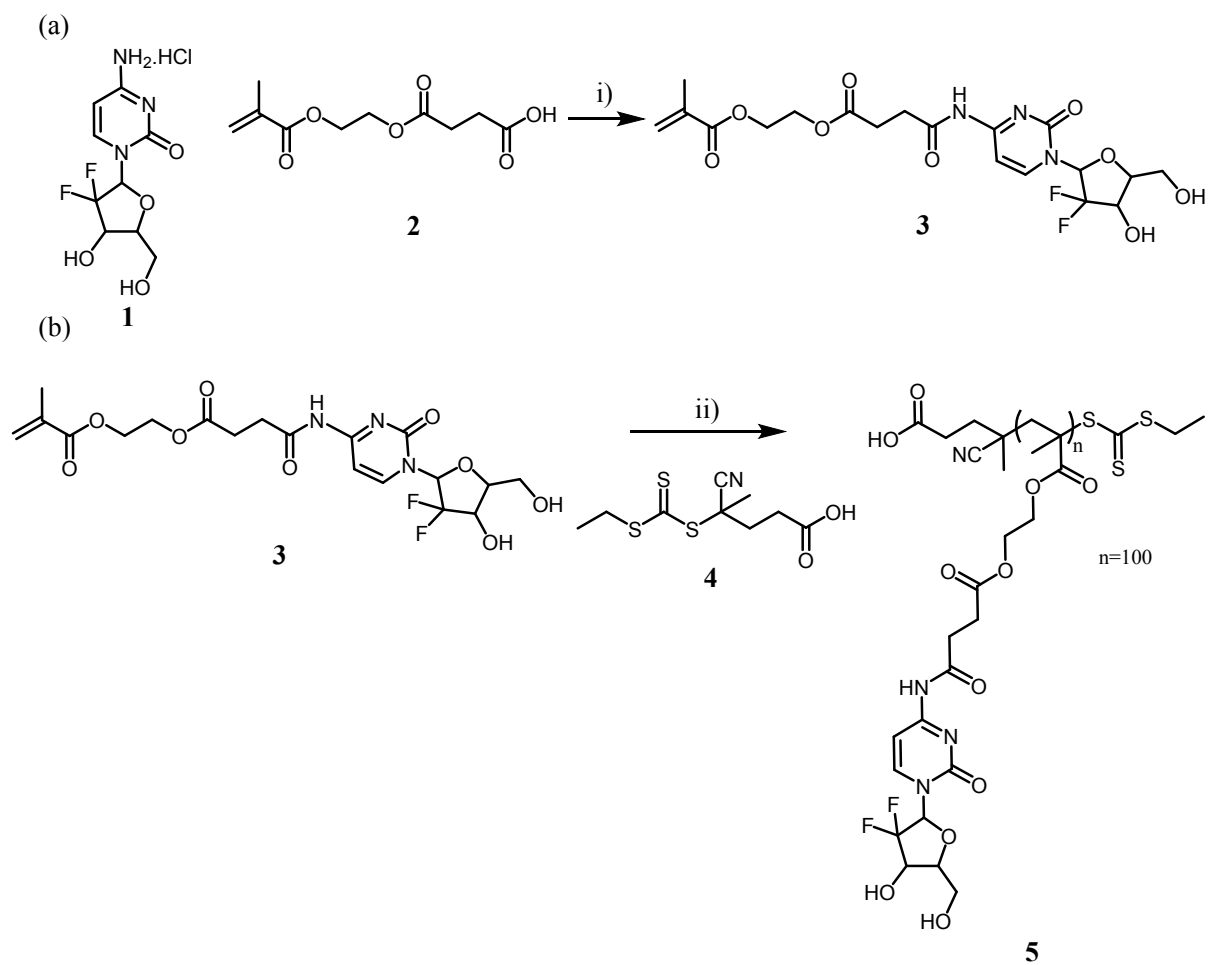

**Scheme S1** (a) Synthesis of methacrylate-based GEM-monomer conjugate **3**: i) HOBT/EDC, pyridine, 72 h, at room temperature, DMF, under positive Ar (b) RAFT polymerization conditions of **3** using a trithiocarbonate **4** as CTA: ii) 4 h at 70 °C in DMF under positive N<sub>2</sub>.

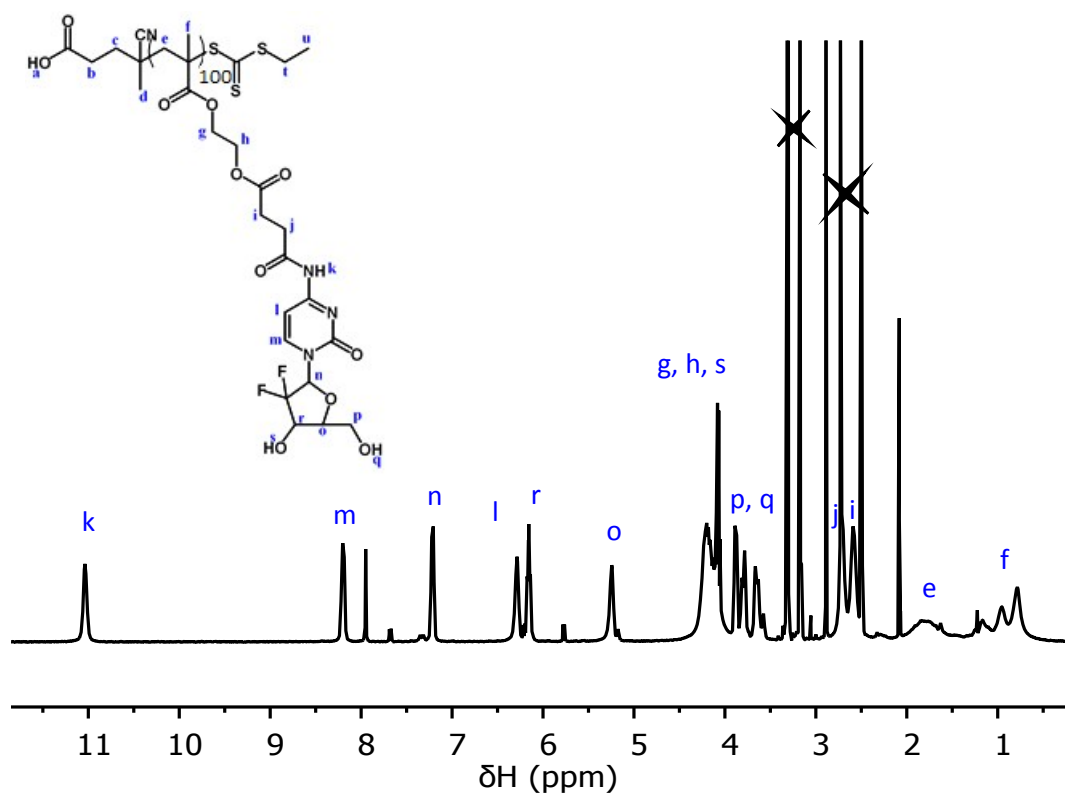

**Fig. S1** <sup>1</sup>H NMR (400 MHz, DMSO-d<sub>6</sub>) spectrum of the GEM-polymer conjugate **5**; DP 100 (× designates the NMR and residual solvents peaks).

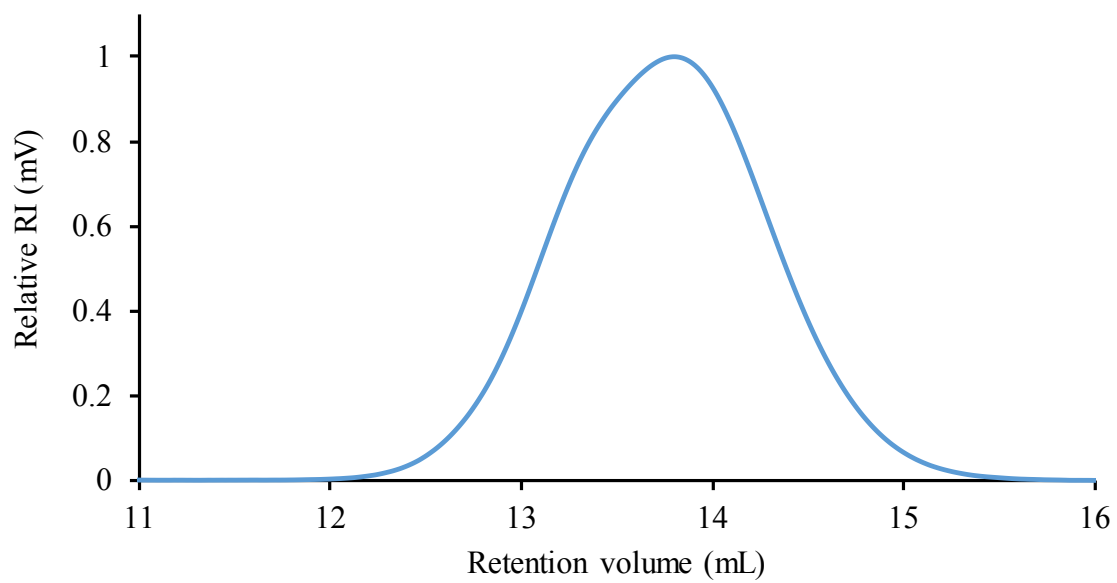

**Fig. S2** SEC trace of GEM-polymer conjugate in DMF.

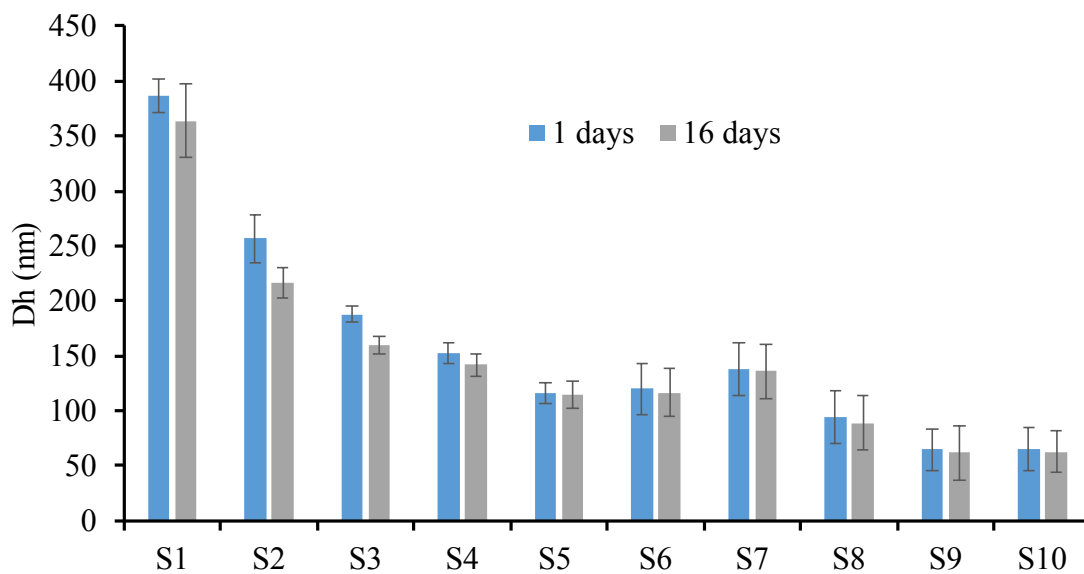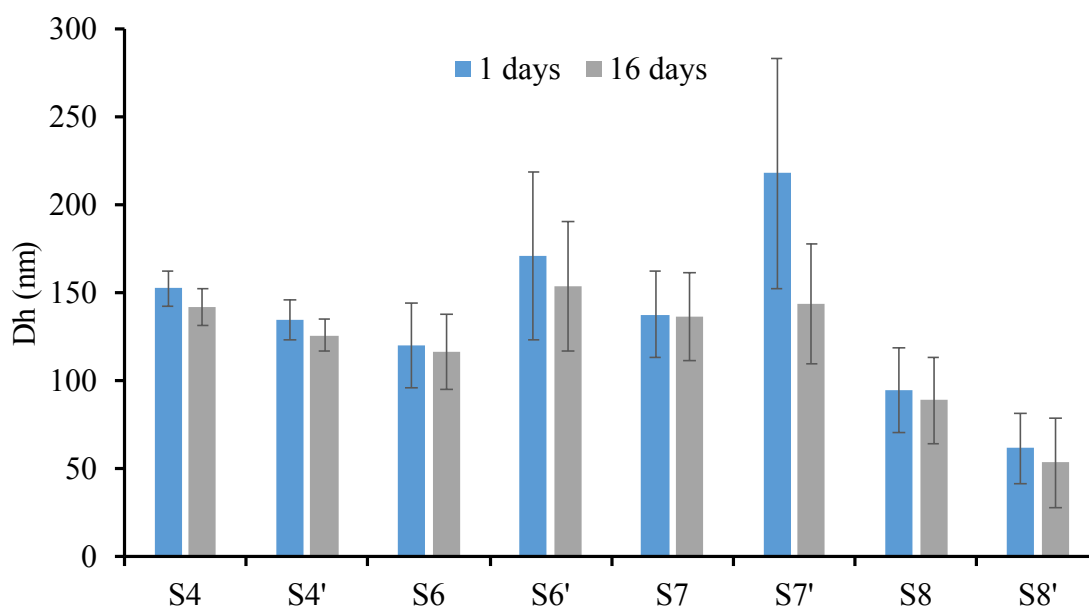

**Fig. S3** DLS measurements of hybrids NPs after 16 days.

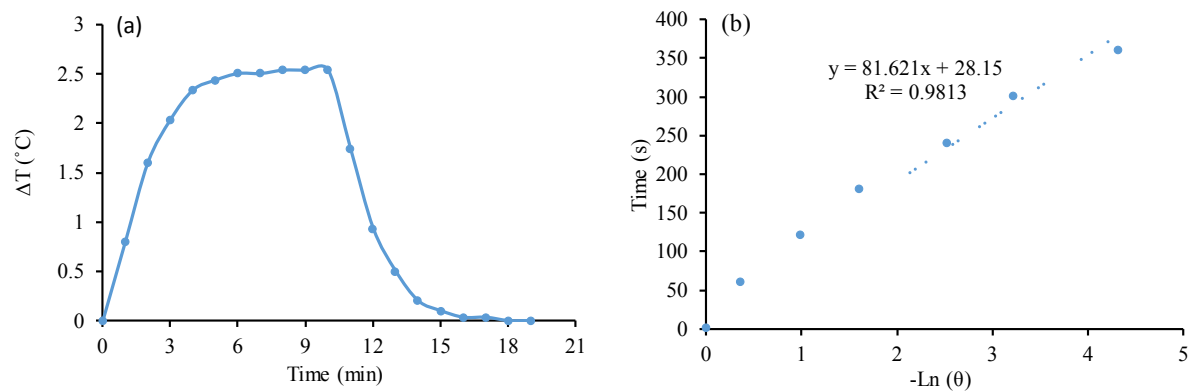

**Fig. S4** (a) photothermal effect of the irradiation of the aqueous dispersion of GNPs for 10 min with a red laser (640 nm, 0.8 W/cm<sup>2</sup>) and then the laser was turned off and (b) linear time data from the cooling period versus negative natural logarithm of driving force temperature which was obtained from the cooling phase.

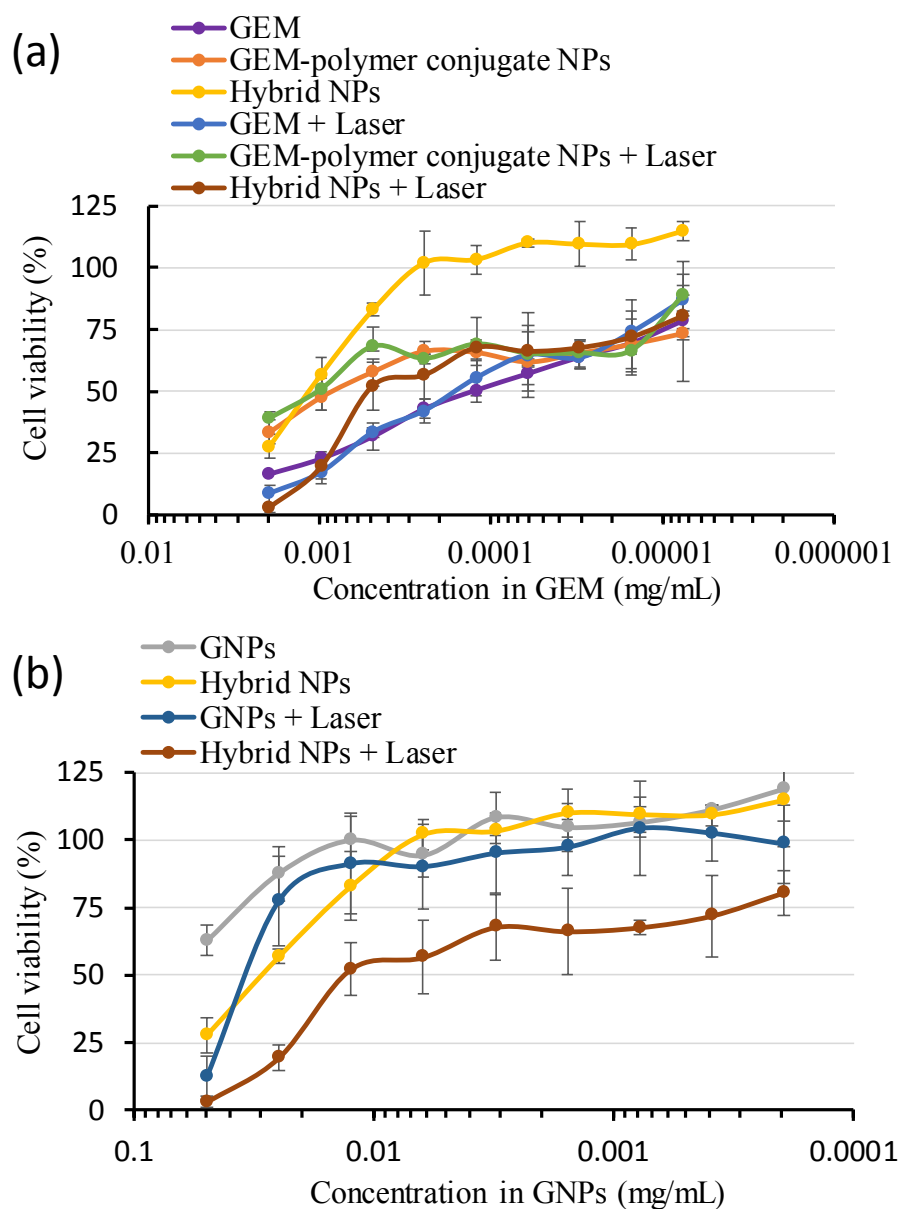

**Fig. S5** Evolution of the cell viability as a function of the concentration of (a) GEM and (b) GNPs.

- 1 X. Liu, B. Li, F. Fu, K. Xu, R. Zou, Q. Wang, B. Zhang, Z. Chen and J. Hu, *Dalton Trans.*, 2014, **43**, 11709-11715.
- 2 S. Manni, A. Brancalion, L. Quotti Tubi, A. Colpo, L. Pavan, A. Cabrelle, E. Ave, F. Zaffino, G. Di Maira, M. Ruzzene, F. Adami, R. zambello, M. R. Pitari, P. Tassone, L. A. Pinna, C. Gurrieri, G. Semenzato and F. Piazza, *Clin. Cancer Res.*, 2012, DOI: 10.1158/1078-0432.ccr-11-1789.
